# Supplementary material for: Sociological study of religiosity in post-atheist Kazakhstan
Source: Frontiers journal article supplement (doi:10.3389/fsoc.2025.1609030), 2025-07-07
Supplement: Table_1.docx [file Table_1.docx]

Supplementary Material

# Supplementary Figures and Tables

Table 1.

*Distribution of population aged 18 to 65 years by types of settlement*

| Regions | Population aged 18 to 65, people | % | Number of respondents (per quarter), persons | Total number of respondents, people |
| --- | --- | --- | --- | --- |
| Republic of Kazakhstan | 11 508 280 | 100,0 | 1 500 | 6 000 |
| Akmola region | 483 644 | 4,2 | 63 | 252 |
| Aktobe region | 539 479 | 4,7 | 70 | 280 |
| Almaty region | 861 261 | 7,5 | 112 | 448 |
| Atyrau Region | 386 710 | 3,4 | 50 | 200 |
| West Kazakhstan region | 413 553 | 3,6 | 54 | 216 |
| Zhambyl region | 670 723 | 5,8 | 87 | 348 |
| Karaganda region | 694 518 | 6,0 | 91 | 364 |
| Kostanay region | 526 971 | 4,6 | 69 | 276 |
| Kyzylorda region | 456 463 | 4,0 | 59 | 236 |
| Mangistau region | 411 086 | 3,6 | 54 | 216 |
| Pavlodar region | 467 611 | 4,1 | 61 | 244 |
| North Kazakhstan region | 336 831 | 2,9 | 44 | 176 |
| Turkestan region | 1 099 384 | 9,6 | 143 | 572 |
| East Kazakhstan region | 446 456 | 3,9 | 58 | 232 |
| Astana city | 839 718 | 7,3 | 109 | 436 |
| Almaty city | 1 337 488 | 11,6 | 174 | 696 |
| Shymkent city | 652 297 | 5,7 | 85 | 340 |
| Abay region | 359 493 | 3,1 | 47 | 188 |
| Zhetisu region | 395 790 | 3,4 | 52 | 208 |
| Ulytau region | 128 804 | 1,1 | 18 | 72 |

Table 2

*Responses to the question: “Please tell me, do you consider yourself a believer?”*

| Scale | Period | Population | | Youth  18-35 years old | | Ethnic groups | | |
| --- | --- | --- | --- | --- | --- | --- | --- | --- |
| Kazakhs | Russians | Other |
| Yes, I am a practicing believer, I strictly observe all the rules and rituals | Q1 | **19,1** | | **18,1** | | **22,1** | 9,8 | 13,7 |
| Q2 | | **18,3** | | **17,0** | **21,2** | 9,7 | 13,9 |
| Q3 | | **18,2** | | **17,6** | **21,2** | 9,4 | 13,2 |
| Q4 | | **24,1** | | **21,5** | **27,2** | 13,9 | 20,6 |
| Yes, I am a believer, but I limit myself to holidays and observing some religious rituals | Q1 | | **66,5** | | **68,1** | 66,9 | 64,7 | **67,0** |
| Q2 | | **67,4** | | **69,4** | 67,2 | 67,2 | **68,4** |
| Q3 | | **68,3** | | **70,0** | 67,1 | **71,5** | 70,3 |
| Q4 | | **62,7** | | **65,9** | 62,9 | **60,5** | 64,1 |
| No, I am not a believer, but I do observe certain religious rituals | Q1 | | 7,1 | | 8,5 | 5,0 | 16,2 | 8,0 |
| Q2 | | 8,2 | | 9,5 | 6,6 | 15,5 | 8,1 |
| Q3 | | 9,9 | | 10,1 | 8,6 | **16,6** | 9,0 |
| Q4 | | 9,2 | | 9,5 | 7,0 | **18,9** | 9,1 |
| No, I am not a believer and I do not observe religious rituals | Q1 | | 3,5 | | 2,7 | 2,8 | 6,4 | 3,8 |
| Q2 | | 2,9 | | 1,9 | 2,6 | 5,0 | 2,4 |
| Q3 | | 1,9 | | 0,8 | 1,9 | 2,1 | 2,4 |
| Q4 | | 1,3 | | 0,8 | 0,8 | 3,8 | 1,0 |
| No, I am not a believer, but I am calm about the fact that others do it | Q1 | | 0,7 | | 0,2 | 0,7 | 0,4 | 0,9 |
| Q2 | | 0,5 | | 0,3 | 0,5 | 0,4 | 1,0 |
| Q3 | | 0,3 | | 0,0 | 0,1 | 0,0 | 1,4 |
| Q4 | | 0,5 | | 0,3 | 0,4 | 0,4 | 1,0 |
| I am a convinced atheist and I don't understand religious people | Q1 | | 1,6 | | 1,0 | 1,3 | 2,1 | 2,4 |
| Q2 | | 1,3 | | 0,6 | 1,0 | 1,3 | 2,4 |
| Q3 | | 0,6 | | 0,2 | 0,6 | 0,4 | 0,5 |
| Q4 | | 0,9 | | 0,5 | 0,8 | 1,3 | 1,0 |
| I am an agnostic, I don't know if there is a God. | Q1 | | 0,5 | | 0,0 | 0,3 | 0,0 | 2,4 |
| Q2 | | 0,6 | | 0,0 | 0,2 | 0,4 | 2,4 |
| Q3 | | 0,3 | | 0,2 | 0,1 | 0,0 | 1,9 |
| Q4 | | 0,5 | | 0,3 | 0,3 | 1,3 | 1,0 |
| Other | Q1 | | 0,0 | | 0,0 | 0,0 | 0,0 | 0,0 |
| Q2 | | 0,0 | | 0,0 | 0,0 | 0,0 | 0,0 |
| Q3 | | 0,0 | | 0,0 | 0,0 | 0,0 | 0,0 |
| Q4 | | 0,0 | | 0,0 | 0,0 | 0,0 | 0,0 |
| Can’t say | Q1 | | 0,9 | | 1,4 | 0,9 | 0,4 | 1,9 |
| Q2 | | 0,5 | | 1,1 | 0,8 | 0,4 | 1,4 |
| Q3 | | 05 | | 0,4 | 0,4 | 00 | 1,9 |
| Q4 | | 0,8 | | 1,3 | 0,8 | 0,4 | 1,4 |

Table 3

*Responses of Muslims to the question: “If you are a Muslim, what traditions and customs have you followed in your daily life over the past 12 months?”, %*

| **Answer options** | **Measurement** | **Every day** | **Every week** | **Every month** | **2-3**  **Times in year** | **Once every few years** | **Never** | **Can’t say** |
| --- | --- | --- | --- | --- | --- | --- | --- | --- |
| Visiting a religious building (mosque, church, prayer house) | Q1 | 5,0 | 15,2 | 17,6 | 34,6 | 14,9 | 11,0 | 1,6 |
| Q2 | 5,5 | 14,7 | 17,1 | 34,0 | 16,4 | 10,7 | 1,5 |
| Q3 | 5,3 | 12,1 | 15,5 | 34,2 | 19,6 | 11,9 | 1,5 |
| Q4 | 6,2 | 14,5 | 17,5 | **33,8** | 16,1 | 10,4 | 1,5 |
| Perform prayers | Q1 | 20,0 | 7,6 | 12,9 | 18,5 | 10,4 | 29,6 | 1,1 |
| Q2 | 19,0 | 8,3 | 13,1 | 13,1 | 12,0 | 28,5 | 1,1 |
| Q3 | 17,7 | 6,6 | 12,5 | 20,5 | 13,9 | 27,9 | 1,0 |
| Q4 | **19,3** | **8,2** | 13,3 | 18,5 | 11,8 | **27,9** | 1,0 |
| Reading religious literature | Q1 | 4,9 | 4,6 | 11,2 | 25,9 | 14,1 | 36,8 | 2,4 |
| Q2 | 4,3 | 6,1 | 12,6 | 26,3 | 14,6 | 34,4 | 1,6 |
| Q3 | 5,4 | 4,2 | 12,4 | 26,4 | 21,7 | 28,0 | 1,9 |
| Q4 | 4,9 | 6,1 | 12,4 | 27,0 | 14,3 | **33,7** | 1,5 |
| Watching religious TV channels | Q1 | 2,5 | 3,3 | 12,5 | 22,6 | 19,7 | 36,6 | 2,9 |
| Q2 | 2,3 | 4,2 | 13,5 | 23,9 | 21,7 | 32,5 | 2,0 |
| Q3 | 3,0 | 2,6 | 12,7 | 23,7 | 24,3 | 31,2 | 2,6 |
| Q4 | 3,3 | 4,1 | 13,2 | 24,3 | 21,3 | **31,9** | 1,9 |
| Visiting religious websites | Q1 | 3,3 | 2,9 | 8,7 | 16,8 | 18,9 | 45,1 | 4,3 |
| Q2 | 3,0 | 4,2 | 10,1 | 17,7 | 21,6 | 41,0 | 2,4 |
| Q3 | 4,2 | 2,5 | 10,1 | 18,6 | 23,3 | 37,6 | 3,5 |
| Q4 | 3,8 | 4,2 | 9,9 | 18,1 | 21,3 | **40,4** | 2,4 |
| Talking to relatives about religion | Q1 | 4,6 | 3,8 | 12,0 | 33,9 | 15,1 | 28,6 | 2,1 |
| Q2 | 4,0 | 4,0 | 12,1 | 32,5 | 18,1 | 27,9 | 1,3 |
| Q3 | 5,0 | 3,3 | 12,7 | 34,0 | 18,5 | 24,6 | 1,9 |
| Q4 | 4,3 | 4,0 | 12,2 | **33,0** | 17,9 | **27,3** | 1,3 |
| Talking with friends and fellow believers about religion | Q1 | 3,7 | 3,2 | 14,8 | 29,1 | 18,3 | 27,2 | 3,8 |
| Q2 | 3,9 | 3,9 | 14,7 | 28,4 | 20,9 | 25,5 | 2,5 |
| Q3 | 4,1 | 2,9 | 15,5 | 29,1 | 21,8 | 23,2 | 3,4 |
| Q4 | 4,2 | 3,9 | 14,8 | **29,0** | 20,6 | **25,0** | 2,4 |
| Talking to the clergy (imam, priest, pastor, rabbi) | Q1 | 1,6 | 3,6 | 7,4 | 29,2 | 20,2 | 36,4 | 1,6 |
| Q2 | 1,8 | 4,0 | 8,1 | 28,1 | 21,7 | 34,7 | 1,5 |
| Q3 | 2,1 | 3,1 | 8,2 | 30,1 | 22,1 | 33,1 | 1,3 |
| Q4 | 2,8 | 4,0 | 7,9 | **28,1** | 21,7 | **34,1** | 1,5 |

Table 4

*Responses to the question: “How often do you perform the following actions?”, %*

| **Answer options** | **Measurement** | **Every day** | **Every week** | **Every month** | **2-3**  **Times in year** | **Once every few years** | **Never** | **Can’t say** |
| --- | --- | --- | --- | --- | --- | --- | --- | --- |
| Visiting a religious building (mosque, church, prayer house) | Q1 | 5,0 | 15,2 | 17,6 | 34,6 | 14,9 | 11,0 | 1,6 |
| Q2 | 5,5 | 14,7 | 17,1 | 34,0 | 16,4 | 10,7 | 1,5 |
| Q3 | 5,3 | 12,1 | 15,5 | 34,2 | 19,6 | 11,9 | 1,5 |
| Q4 | 6,2 | 14,5 | 17,5 | **33,8** | 16,1 | 10,4 | 1,5 |
| Perform prayers | Q1 | 20,0 | 7,6 | 12,9 | 18,5 | 10,4 | 29,6 | 1,1 |
| Q2 | 19,0 | 8,3 | 13,1 | 13,1 | 12,0 | 28,5 | 1,1 |
| Q3 | 17,7 | 6,6 | 12,5 | 20,5 | 13,9 | 27,9 | 1,0 |
| Q4 | **19,3** | **8,2** | 13,3 | 18,5 | 11,8 | **27,9** | 1,0 |
| Reading religious literature | Q1 | 4,9 | 4,6 | 11,2 | 25,9 | 14,1 | 36,8 | 2,4 |
| Q2 | 4,3 | 6,1 | 12,6 | 26,3 | 14,6 | 34,4 | 1,6 |
| Q3 | 5,4 | 4,2 | 12,4 | 26,4 | 21,7 | 28,0 | 1,9 |
| Q4 | 4,9 | 6,1 | 12,4 | 27,0 | 14,3 | **33,7** | 1,5 |
| Watching religious TV channels | Q1 | 2,5 | 3,3 | 12,5 | 22,6 | 19,7 | 36,6 | 2,9 |
| Q2 | 2,3 | 4,2 | 13,5 | 23,9 | 21,7 | 32,5 | 2,0 |
| Q3 | 3,0 | 2,6 | 12,7 | 23,7 | 24,3 | 31,2 | 2,6 |
| Q4 | 3,3 | 4,1 | 13,2 | 24,3 | 21,3 | **31,9** | 1,9 |
| Visiting religious websites | Q1 | 3,3 | 2,9 | 8,7 | 16,8 | 18,9 | 45,1 | 4,3 |
| Q2 | 3,0 | 4,2 | 10,1 | 17,7 | 21,6 | 41,0 | 2,4 |
| Q3 | 4,2 | 2,5 | 10,1 | 18,6 | 23,3 | 37,6 | 3,5 |
| Q4 | 3,8 | 4,2 | 9,9 | 18,1 | 21,3 | **40,4** | 2,4 |
| Talking to relatives about religion | Q1 | 4,6 | 3,8 | 12,0 | 33,9 | 15,1 | 28,6 | 2,1 |
| Q2 | 4,0 | 4,0 | 12,1 | 32,5 | 18,1 | 27,9 | 1,3 |
| Q3 | 5,0 | 3,3 | 12,7 | 34,0 | 18,5 | 24,6 | 1,9 |
| Q4 | 4,3 | 4,0 | 12,2 | **33,0** | 17,9 | **27,3** | 1,3 |
| Talking with friends and fellow believers about religion | Q1 | 3,7 | 3,2 | 14,8 | 29,1 | 18,3 | 27,2 | 3,8 |
| Q2 | 3,9 | 3,9 | 14,7 | 28,4 | 20,9 | 25,5 | 2,5 |
| Q3 | 4,1 | 2,9 | 15,5 | 29,1 | 21,8 | 23,2 | 3,4 |
| Q4 | 4,2 | 3,9 | 14,8 | **29,0** | 20,6 | **25,0** | 2,4 |
| Talking to the clergy (imam, priest, pastor, rabbi) | Q1 | 1,6 | 3,6 | 7,4 | 29,2 | 20,2 | 36,4 | 1,6 |
| Q2 | 1,8 | 4,0 | 8,1 | 28,1 | 21,7 | 34,7 | 1,5 |
| Q3 | 2,1 | 3,1 | 8,2 | 30,1 | 22,1 | 33,1 | 1,3 |
| Q4 | 2,8 | 4,0 | 7,9 | **28,1** | 21,7 | **34,1** | 1,5 |

Table 5

*Responses to the question: «In what specific manner were your rights to freedom of religion infringed?»*

| **Answers** | **Population** | | **Youth 18–35**  **years old** | |
| --- | --- | --- | --- | --- |
| **Amount** | **%** | **Amount** | **%** |
| Public dissemination of materials offensive to my religion in the media | 157 | 11,5 | 63 | 6,1 |
| Offensive comments about my religion  on social media | 221 | 16,2 | **97** | **9,4** |
| Posting offensive pictures to my religion on the Internet | 264 | 19,3 | **111** | **10,8** |
| Refusal of my visit to a religious building (mosque, church) by the clergy | 107 | 7,8 | 42 | 4,1 |

Table 6

*Responses to the question: «What factors do you believe contribute to the increasing number of young individuals embracing religion?» %*

| **Answers** | **Measurement** | **Population** | **Youth 18–35**  **years old** |
| --- | --- | --- | --- |
| The influence of foreign preachers | Q1 | 20,9 | 8,5 |
| Q2 | 21,8 | 8,8 |
| Q3 | 19,0 | 9,2 |
| Q4 | 21,8 | 9,4 |
| The Impact of Internet Propaganda | Q1 | 36,0 | 15,1 |
| Q2 | 35,7 | 15,2 |
| Q3 | 29,2 | 14,7 |
| Q4 | 34,7 | 16,1 |
| Return to sincere faith, religion | Q1 | 18,7 | 8,5 |
| Q2 | 18,8 | 8,6 |
| Q3 | 16,0 | 8,9 |
| Q4 | 18,5 | 9,2 |
| Restoration of folk traditions | Q1 | 17,7 | 8,7 |
| Q2 | 18,1 | 8,9 |
| Q3 | 15,1 | 8,6 |
| Q4 | 17,4 | 9,2 |
| Filling the Spiritual Void | Q1 | 15,9 | 6,0 |
| Q2 | 15,8 | 6,3 |
| Q3 | 13,8 | 6,3 |
| Q4 | 15,2 | 6,6 |
| Fashion craze | Q1 | 21,4 | 8,9 |
| Q2 | 21,4 | 9,1 |
| Q3 | 27,5 | 12,9 |
| Q4 | 18,7 | 8,6 |
| Imitation of peers, which is typical for young people | Q1 | 29,0 | 14,0 |
| Q2 | 29,0 | 13,9 |
| Q3 | 22,7 | 12,9 |
| Q4 | 27,0 | **14,3** |
| Family education | Q1 | 33,9 | 17,2 |
| Q2 | 34,0 | 17,2 |
| Q3 | 25,3 | 15,9 |
| Q4 | 14,2 | 16,2 |
| Influence of the environment (friends, acquaintances) | Q1 | 31,1 | 13,1 |
| Q2 | 28,8 | 12,0 |
| Q3 | 20,9 | 15,5 |
| Q4 | 23,2 | 10,4 |
| Other | Q1 | 0,2 | 0,0 |
| Q2 | 0,3 | 0,0 |
| Q3 | 0,1 | 0,0 |
| Q4 | 0,3 | 0,0 |
| Total answers: | Q1 | 224,8 | 205,4 |
| Q2 | 223,7 | 206,4 |
| Q3 | 189,7 | 186,2 |
| Q4 | 205,9 | 281,9 |

Table 7

*Responses to the question: «Do you support or oppose the state policy in the religious sphere?» %*

| **Do you support or not the state policy in the religious sphere?** | **Population** | **Youth**  **18-35 age** |
| --- | --- | --- |
| I completely agree | 41% | 42,1% |
| I rather agree | 47,6% | 47,1% |
| Rather disagree | 6,8% | 6,4% |
| I completely disagree | 2,7% | 3% |
| I can’t answer | 1,9% | 1,3% |

Table 8

*Responses to the question: «In the past six months, during challenging life circumstances, whom have you sought for guidance, assistance, or support?» %*

| **Over the past six months, in difficult life situations, who have you turned to for advice, help, support?** | **Population** | **Youth**  **18-35 age** |
| --- | --- | --- |
| To parents, children | 52,1% | 36,20% |
| To relatives | 42,2% | 28% |
| To friends | 31,1% | 23% |
| To groups in messengers | 2,4% | 1,6% |
| To the clergy | 4,8% | 3,3% |
| To psychologists, crisis center workers | 3,8% | 2,2% |
| Other | 6,5% | 4,2% |

Table 9

*Responses to the question: «In a secular state, freedom of conscience is ensured in all spheres of life, including religion, and religion does not interfere with state policy. How do you feel about the fact that Kazakhstan is a secular state?», %*

| **How do you feel about the fact that Kazakhstan is a secular state?** | **Population** | **Youth**  **18-35 age** |
| --- | --- | --- |
| I completely agree | 48,2% | 45,8% |
| I rather agree | 36,3% | 38% |
| Rather disagree | 8,6% | 9,6% |
| I completely disagree | 1,6% | 1,3% |
| I can’t answer | 5,3% | 5,3% |
